# Supplementary material for: Decoding biomaterial-associated molecular patterns (BAMPs): influential players in bone graft-related foreign body reactions
Source: PeerJ journal article supplement (doi:10.7717/peerj.19299), 2025-04-22

**Fig. S1.** Classification of bone grafting biomaterial. The various types of bone grafting biomaterials are categorized based on their source of origin. (Flowchart created using Biorender.com)

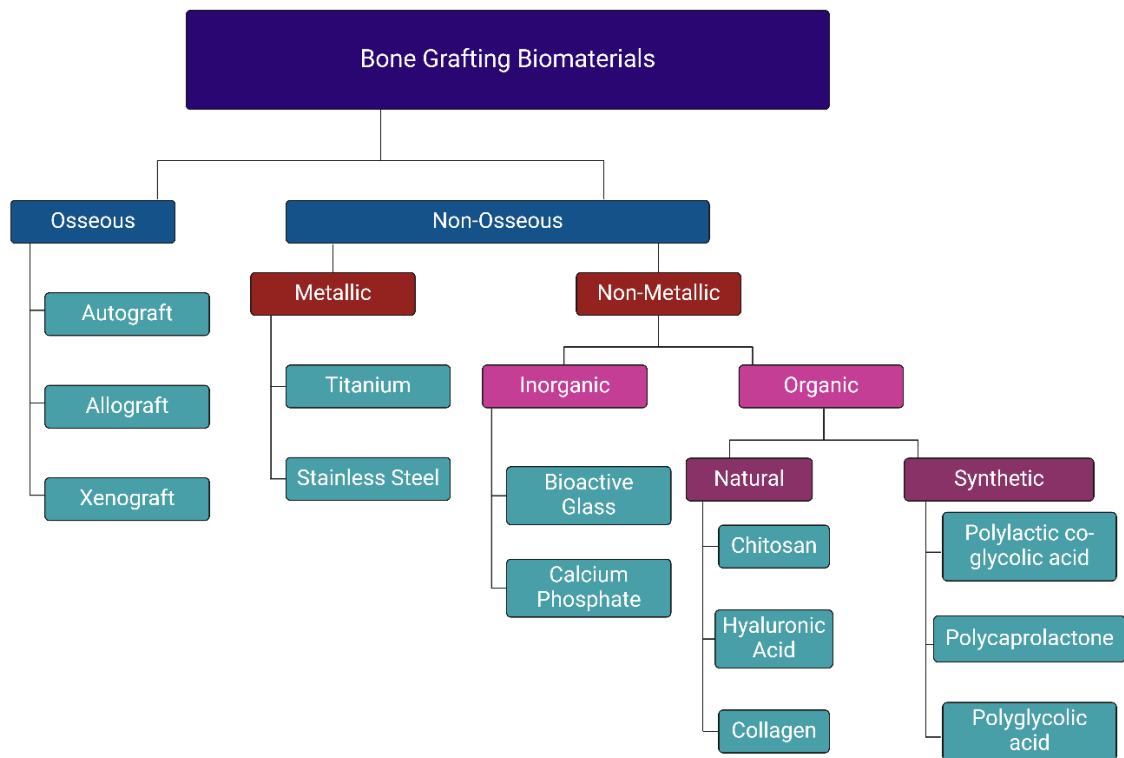

Supplement: FigS1.pdf [file FigS1.pdf]
